# Supplementary material
Source: Springer Nature journal article supplement (https://www.springermedizin.de/resource/supplementary/12895_2012_138_MOESM5_ESM.pdf/9514182)

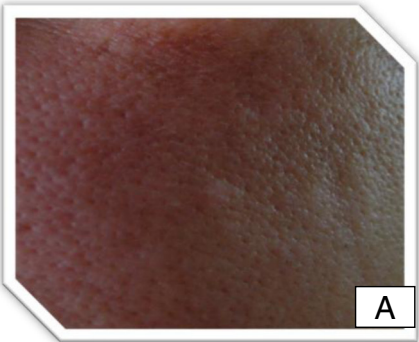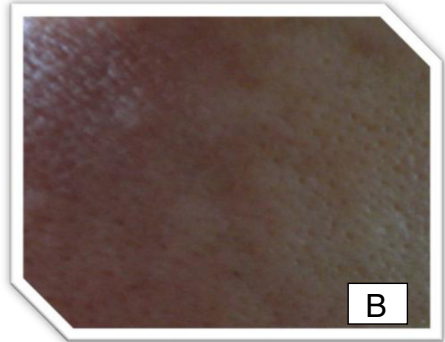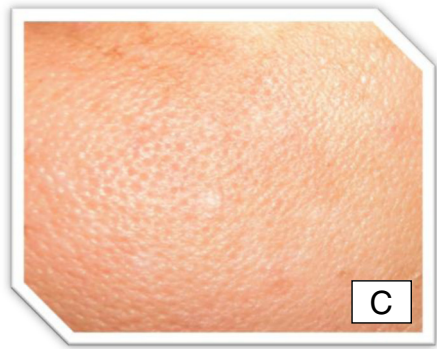

Supplement: MOESM5 [file 9514182]
